# Supplementary material for: FAM83H Expression Is Associated with Tumor-Infiltrating PD1-Positive Lymphocytes and Predicts the Survival of Breast Carcinoma Patients
Source: MDPI journal article supplement (doi:10.3390/diagnostics13182959), 2023-09-15
Supplement: s1 [file s1]

## Supplementary materials

# FAM83H expression is associated with tumor-infiltrating PD1-positive lymphocytes and predicts the survival of breast carcinoma patients

Ji Eun Choi <sup>1,\*†</sup>, Ae Ri Ahn <sup>2†</sup>, Junyue Zhang <sup>2</sup>, Kyoung Min Kim <sup>2,3,4</sup>, Ho Sung Park <sup>2,3,4</sup>, Ho Lee <sup>5</sup>, Myoung Ja Chung <sup>2,3,4</sup>, Woo Sung Moon <sup>2,3,4</sup> and Kyu Yun Jang <sup>2,3,4,\*</sup>

<sup>1</sup> Department of Pathology, Chungnam National University Sejong Hospital, Sejong 30099, Republic of Korea

<sup>2</sup> Department of Pathology, Jeonbuk National University Medical School, Jeonju 54896, Republic of Korea; xoxoyool@naver.com (A.R.A.); yuezai123@naver.com (J.Z.); kmkim@jbnu.ac.kr (K.M.K.);

hspark@jbnu.ac.kr (H.S.P.); mjchung@jbnu.ac.kr (M.J.C.); mws@jbnu.ac.kr (W.S.M.)

<sup>3</sup> Research Institute of Clinical Medicine, Jeonbuk National University, Jeonju 54896, Republic of Korea

<sup>4</sup> Research Institute, Jeonbuk National University Hospital, Jeonju 54896, Republic of Korea

<sup>5</sup> Department of Forensic Medicine, Jeonbuk National University Medical School, Jeonju 54896, Republic of Korea; foremed@jbnu.ac.kr

\* Correspondence: b612elf@gmail.com (J.E.C.); kyjang@jbnu.ac.kr (K.Y.J.)

† These authors contributed equally to this work.

**Supplementary Table S1.** Clinical variables and the expression of FAM83H and PD1 in BCAs.

| Characteristics            |            | No. | FAM83H-Nu |          | FAM83H-Cy |          | PD1         |          |
|----------------------------|------------|-----|-----------|----------|-----------|----------|-------------|----------|
|                            |            |     | Positive  | <i>p</i> | Positive  | <i>p</i> | Positive    | <i>p</i> |
| Age, y                     | < 50       | 136 | 60 (44%)  | 0.042    | 71 (52%)  | 0.067    | 52 (38%)    | 0.120    |
|                            | ≥50        | 62  | 37 (60%)  |          | 41 (66%)  |          | 31 (50%)    |          |
| Tumor stage                | I          | 40  | 17 (43%)  | 0.008    | 24 (60%)  | 0.148    | 14 (35%)    | 0.416    |
|                            | II         | 122 | 54 (44%)  |          | 63 (52%)  |          | 51 (42%)    |          |
| T category of stage        | III and IV | 36  | 26 (72%)  |          | 25 (69%)  |          | 18 (50%)    |          |
|                            | 1          | 62  | 28 (45%)  | 0.236    | 37 (60%)  | 0.423    | 20 (32%)    | 0.076    |
|                            | 2          | 120 | 58 (48%)  |          | 64 (53%)  |          | 58 (48%)    |          |
| Lymph node metastasis      | 3 and 4    | 16  | 11 (69%)  |          | 11 (69%)  |          | 5 (31%)     |          |
|                            | Absence    | 107 | 43 (40%)  | 0.007    | 57 (53%)  | 0.310    | 41 (38%)    | 0.265    |
| Distant metastatic relapse | Presence   | 91  | 54 (59%)  |          | 55 (60%)  |          | 42 (46%)    |          |
|                            | Absence    | 156 | 63 (40%)  | < 0.001  | 82 (53%)  | 0.029    | 55 (35%)    | < 0.001  |
| Histologic type            | Presence   | 42  | 34 (81%)  |          | 30 (71%)  |          | 28 (67%)    |          |
|                            | NST        | 190 | 95 (50%)  | 0.166    | 110 (58%) | 0.066    | 79 (42%)    | 0.636    |
| Histologic grade           | Lobular    | 8   | 2 (25%)   |          | 2 (25%)   |          | 4 (50%)     |          |
|                            | 1          | 55  | 19 (35%)  | 0.007    | 20 (36%)  | < 0.001  | 23 (42%)    | 0.012    |
| Tubule and gland formation | 2          | 96  | 47 (49%)  |          | 58 (60%)  |          | 32 (33%)    |          |
|                            | 3          | 47  | 31 (66%)  |          | 34 (72%)  |          | 28 (60%)    |          |
|                            | 1          | 31  | 10 (32%)  | 0.029    | 10 (32%)  | 0.007    | 14 (45%)    | 0.157    |
| Nuclear pleomorphism       | 2          | 70  | 31 (44%)  |          | 46 (66%)  |          | 23 (33%)    |          |
|                            | 3          | 97  | 56 (58%)  |          | 56 (58%)  |          | 46 (47%)    |          |
|                            | 1          | 11  | 4 (36%)   | 0.002    | 3 (27%)   | < 0.001  | 5 (45%)     | 0.330    |
| Mitoses/10 HPF             | 2          | 69  | 23 (33%)  |          | 25 (36%)  |          | 24 (35%)    |          |
|                            | 3          | 118 | 70 (59%)  |          | 84 (71%)  |          | 54 (46%)    |          |
|                            | 0-9        | 127 | 58 (46%)  | 0.151    | 67 (53%)  | 0.060    | 48 (38%)    | 0.241    |
| HER2                       | 10-19      | 33  | 15 (45%)  |          | 17 (52%)  |          | 15 (45%)    |          |
|                            | > 19       | 38  | 24 (63%)  |          | 28 (74%)  |          | 20 (53%)    |          |
|                            | Negative   | 133 | 53 (40%)  | < 0.001  | 65 (49%)  | 0.002    | 53 (40%)    | 0.399    |
| ER                         | Positive   | 65  | 44 (68%)  |          | 47 (72%)  |          | 30 (46%)    |          |
|                            | Negative   | 66  | 41 (62%)  | 0.009    | 45 (68%)  | 0.020    | 33 (50%)    | 0.103    |
| PR                         | Positive   | 132 | 56 (42%)  |          | 67 (51%)  |          | 50 (38%)    |          |
|                            | Negative   | 89  | 51 (57%)  | 0.034    | 59 (66%)  | 0.013    | 41 (46%)    | 0.285    |
| PD1                        | Positive   | 109 | 46 (42%)  |          | 53 (49%)  |          | 42 (39%)    |          |
|                            | Negative   | 115 | 43 (37%)  | < 0.001  | 56 (49%)  | 0.009    |             |          |
| FAM83H-Cy                  | Positive   | 83  | 54 (65%)  |          | 56 (67%)  |          |             |          |
|                            | Negative   | 86  | 13 (15%)  | < 0.001  |           |          | 26.8 ± 5.5* | 0.099**  |
| FAM83H-Nu                  | Positive   | 112 | 84 (75%)  |          |           |          | 40.4 ± 5.8* |          |
|                            | Negative   | 101 |           |          |           |          | 24.6 ± 4.8* | 0.012**  |
|                            | Positive   | 97  |           |          |           |          | 44.8 ± 6.5* |          |

\*The number of PD1-positive cells, mean ± standard error. \*\*Student's t-test. Abbreviations: FAM83H-Nu, nuclear FAM83H; FAM83H-Cy, cytoplasmic FAM83H; NST, no special type; ER, estrogen receptor; PR, progesterone receptor.
